# Supplementary material
Source: PubMed Central journal article supplement (PMC3198377)
Supplement: 1014511108_pnas.201014511SI.pdf [file 1014511108_pnas.201014511SI.pdf]

# Supporting Information

Milton et al. 10.1073/pnas.1014511108

## SI Materials and Methods

**Drosophila Strains and Genetic Controls.** We used the following strains in our analyses: *spin*<sup>4</sup> and *spin*<sup>5</sup> (1), *sod1*<sup>n1</sup>, *sod1*<sup>n62</sup>, *sod2*<sup>Δ12</sup>, *sod2*<sup>Δ02</sup>, UAS-*JNK*<sup>IK53R</sup>, UAS-*fos*<sup>DN</sup>, UAS-*jun*<sup>DN</sup> (2, 3), *atg1*<sup>1003b3</sup>, *atg1*<sup>DG23110</sup>, *atg18*<sup>IKG03090</sup>, *Df(3L)Exel6112/TM6b*, *puc*<sup>E69</sup>, MHC-GAL4, and *ElaV*-GAL4(3E1) (Bloomington Stock Center), *spin*GAL4, *spin*<sup>Δ58</sup> (Daisuke Yamamoto, Tohoku University, Sendai, Japan) (4), UAS-*hSOD1*, UAS-*cat*, and UAS-*TrxR1* (Fanis Missirlis, Queen Mary's University, London, UK), UAS-*atg5*IR (Manolis Fanto, King's College, London, UK), UAS-*ASK1*<sup>DN</sup> (Masayuki Miura, University of Tokyo, Tokyo, Japan) (5), *hiw*<sup>ND9</sup> (Aaron DiAntonio, Washington University, St. Louis, MO) (6), and *gst-D*-GFP (Dirk Bohmann, University of Rochester, Rochester, NY) (7).

**Fly Husbandry.** Flies were kept on standard yeast, sugar, and agar mix at 25 °C. Paraquat treatment: first-instar larvae were transferred to formula 424 instant *Drosophila* medium with yeast and (Carolina Biological Supply Company) made up with an equal volume of water containing paraquat (Sigma).

**Immunocytochemistry.** Wandering third-instar larvae were dissected and stained as described previously (1). Fly adult brains were dissected in 4% formaldehyde/PBS and stained with nc82 antibody (Developmental Studies Hybridoma Bank). Brains were processed identically to third-instar larvae. β-Gal induction was imaged using rabbit anti-LacZ (Cappel; 1/1,000), control larvae being stained in the same solutions as the experimental larvae.

**Imaging and Quantification.** Bouton number at muscle 6/7 of segment A3 was determined by counting every distinct spherical anti-syt stained varicosity along the motor neuron at the muscle. Muscle surface area was calculated by imaging muscle 6/7 with a Leica DC500 digital camera with a Leica DMLA microscope and calculating the size using ImageJ. For Figs. S3 and S4, data are presented as raw bouton number, muscle surface area, and bouton number normalized to wild-type muscle surface area. This division is because of the smaller developmental size of the *sod1*, *sod2*, and paraquat-treated animals. Bouton numbers were normalized by dividing the bouton number by the muscle surface area and multiplying by mean wild-type muscle surface area. In experiments involving *spin* and *hiw* mutants, muscle surface area was always found to be identical to wild-type so normalization was deemed unnecessary. In *sod1* and *sod2* mutants, muscle fibers are smaller than wild-type, although we present our data as raw bouton number. This analysis represents an underestimate of synaptic overgrowth in these animals. We present in Fig. S2 the bouton number, as raw bouton counts, muscle surface area,

and normalized to wild-type muscle surface area. In paraquat-treated animals, muscle surface area was seen to vary, and normalization was carried out. Bouton size was measured as width across the bouton at the widest point, using imageJ and images taken with a 63× objective. Branching number was quantified as the number of divergent points on the synaptic arbor. Confocal images were obtained in LSM510; Carl Zeiss using Plan-Apochromat 63× NA 1.4 oil differential (for neuromuscular junctions, NMJs), 40× for anti-lacZ; the same settings were used for experimental and control images.

**Lipid Peroxidation Assay.** Five-day-old flies were collected and stored at –80 °C. Thirty flies were used for Bioxytech LPO-586 assay (Oxis Research). Flies were homogenized in ice-cold PBS/5 mM butylated hydroxytoluene, centrifuged at 3,000 × g at 4 °C for 10 min. A 200-μL sample was added to 650 μL diluted R1 (*N*-methyl-2-phenylindole in acetonitrile with ferric iron in methanol), mixed, 150-μL concentrate HCl then added, and incubated at 45 °C for 60 min. Absorbance at 586 nm was recorded (OD meter) and compared with standards of tetramethoxypropane.

**Fluorimetry.** Whole flies were collected, homogenized on ice in 10 μL per animal of lysis buffer [150 mM NaCl, 20 mM Tris pH8, 2 mM EDTA, 0.5% Igepal with protease inhibitor (Roche)], incubated on ice for 15 min, and spun at 4 °C at 21,000 × g for 10 min, the supernatant spun again for 15 min at 21,000 × g at 4 °C. Next, 300 μL PBS was added to the supernatant and fluorescence measured using a Fluoromax-4 spectrofluorometer. The settings used were: excitation 480 nm and emission recorded between 490 and 600 nm. Similar protein concentrations were confirmed by Bradford Assay.

**Electrophysiology.** Wandering third-instar larvae were dissected in modified HL3 (8). Modified HL3 composition is as follows: NaCl (110 mM), KCl (5 mM), NaHCO<sub>3</sub> (10 mM), Hepes (5 mM), sucrose (30 mM), trehalose (5 mM), CaCl<sub>2</sub> (1 mM), and MgCl<sub>2</sub> (20 mM) (pH 7.2). Intracellular recordings were made in muscle 6 from either segment A3 or A4. A suction electrode was used to stimulate motoneurons at 10 Hz for 10 min. The first 100 excitatory junction potentials were averaged and this value was used to normalize excitatory junction potentials recorded in each individual larva. Graphs show the first 100 stimulations and then averages of 100 stimulations thereafter; every other datapoint is plotted for clarity. Error bars are SEM. There was no significant difference (*P* > 0.05) in either resting membrane potentials or input resistances in any of the genotypes from which they were recorded.

1. Sweeney ST, Davis GW (2002) Unrestricted synaptic growth in *spinster*—a late endosomal protein implicated in TGF-β-mediated synaptic growth regulation. *Neuron* 36:403–416.
2. Rowland AM, Richmond JE, Olsen JG, Hall DH, Bamber BA (2006) Presynaptic terminals independently regulate synaptic clustering and autophagy of GABAA receptors in *Caenorhabditis elegans*. *J Neurosci* 26:1711–1720.
3. Sanyal S, Sandstrom DJ, Hoeffler CA, Ramaswami M (2002) AP-1 functions upstream of CREB to control synaptic plasticity in *Drosophila*. *Nature* 416:870–874.
4. Nakano Y, et al. (2001) Mutations in the novel membrane protein *spinster* interfere with programmed cell death and cause neural degeneration in *Drosophila melanogaster*. *Mol Cell Biol* 21:3775–3788.
5. Bamber BA, Rowland AM (2006) Shaping cellular form and function by autophagy. *Autophagy* 2:247–249.
6. Wan HI, et al. (2000) Highwire regulates synaptic growth in *Drosophila*. *Neuron* 26:313–329.
7. Sykiotis GP, Bohmann D (2008) Keap1/Nrf2 signaling regulates oxidative stress tolerance and lifespan in *Drosophila*. *Dev Cell* 14:76–85.
8. Dermaut B, et al. (2005) Aberrant lysosomal carbohydrate storage accompanies endocytic defects and neurodegeneration in *Drosophila benchwarmer*. *J Cell Biol* 170:127–139.

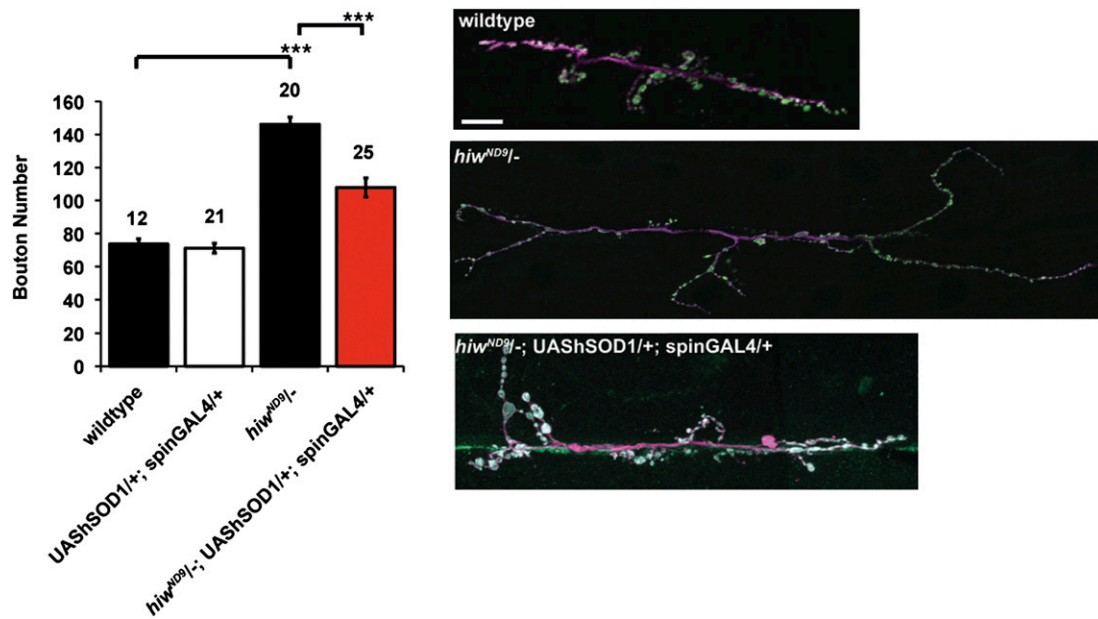

**Fig. 51.** Overexpression of antioxidant transgenes partially rescues *hiw* induced overgrowth. Mutations in *hiw* cause a significant increase in bouton number to  $146 \pm 5.7$  ( $n = 20$ ) compared with wild-type  $74 \pm 3.2$  ( $n = 12$ ). Expression of *hSOD1* using *spinGAL4* reduces bouton number in *hiw* to  $108 \pm 5.90$  ( $n = 25$ ), significantly different from *hiw* ( $***P < 0.001$ , ANOVA).

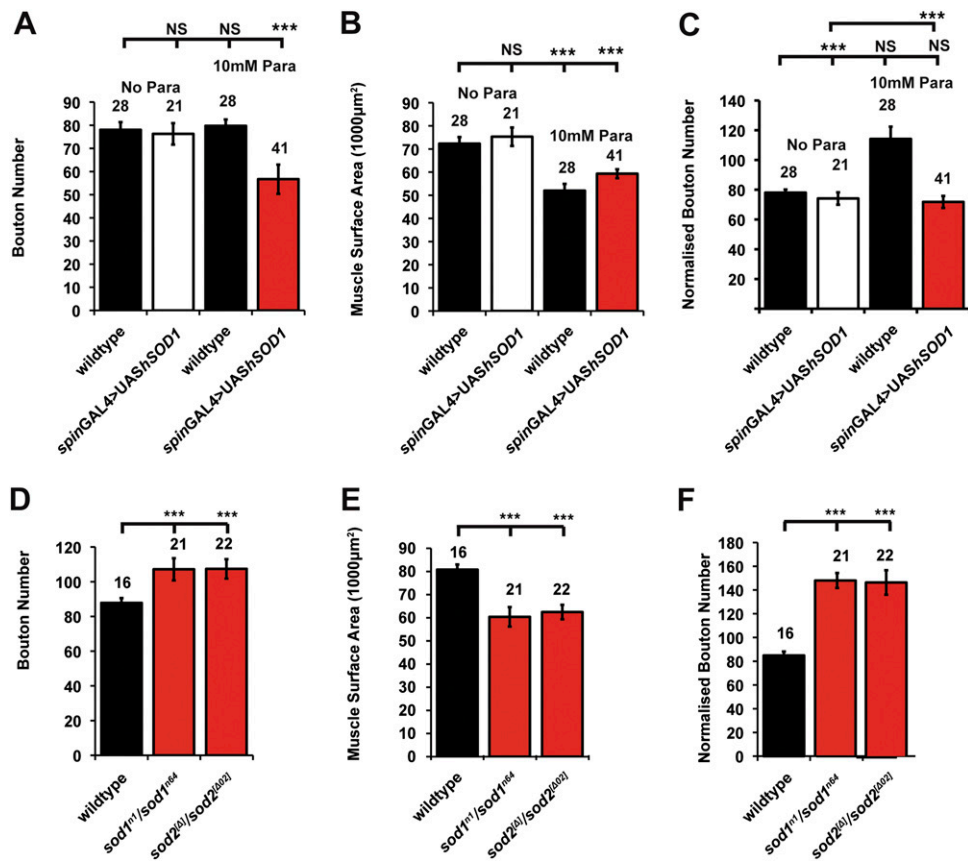

**Fig. S2.** Paraquat feeding and mutants defective for oxidative stress (OS) defense have increased synaptic growth compared with controls. Feeding larvae on 10-mM paraquat results in smaller larvae entering the third-instar stage of development. We present the data here as raw bouton number (A), muscle surface area (to demonstrate reduction in size) (B), and bouton number normalized to wild-type muscle surface area (C). (A) Paraquat feeding (10 mM) generates larvae with an average raw bouton number of  $80 \pm 6.64$  ( $n = 41$ ) compared with animals reared on paraquat expressing UAS-*hSOD1* simultaneously in nerves and muscles (using *spinGAL4*) with a raw bouton number  $57 \pm 2.64$  ( $n = 21$ ) ( $***P < 0.001$ , ANOVA). Overexpression of *hSOD1* in the absence of paraquat did not significantly change raw bouton number ( $76 \pm 5.56$ ,  $n = 21$ ) compared with wild-type ( $78 \pm 2.14$ ,  $n = 28$ ,  $P > 0.05$ , ANOVA). (D) Mutations in *sod1* and *sod2* have bouton numbers of  $107 \pm 4.8$  ( $n = 21$ ) and  $107 \pm 4.9$  ( $n = 22$ ), significantly larger than wild-type synapses, bouton number  $85 \pm 3.3$  ( $n = 16$ ) ( $***P < 0.001$ , ANOVA). (E) Mutations in *sod1* and *sod2* also cause a significant reduction in muscle surface area from wild-type  $80,801 \mu\text{m}^2 \pm 2,264$  ( $n = 16$ ) to  $60,421 \mu\text{m}^2 \pm 4,218$  ( $n = 21$ ) and  $62,478 \mu\text{m}^2 \pm 3,136 \mu\text{m}^2$  ( $n = 22$ ), respectively ( $***P < 0.001$ , ANOVA). (F) Mutations in *sod1* and *sod2* cause significantly overgrown NMJs. Wild-type larvae have a mean bouton number of  $85 \pm 3.3$  ( $n = 16$ ), which is increased by mutations in *sod1* to  $147 \pm 6.3$  ( $n = 21$ ) and *sod2* to  $146 \pm 10.6$  ( $n = 22$ ) normalized to wild-type muscle surface area ( $***P < 0.001$ , ANOVA). Error bars show SEM and the black numbers above each bar is the  $n$  value. Following normalization, both mutations cause a significant increase in bouton number.

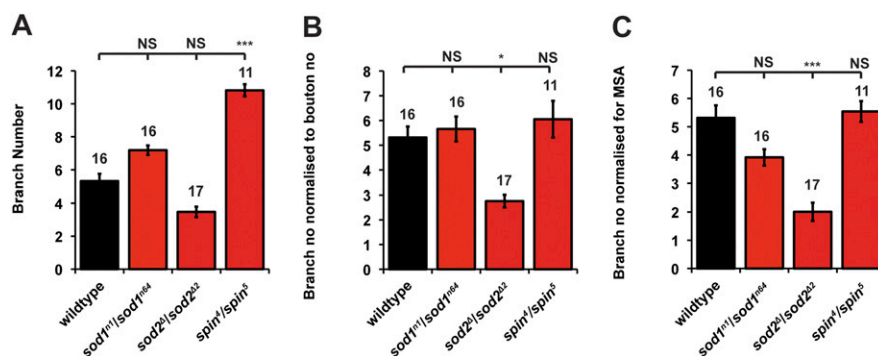

**Fig. S3.** Increases in branching are generally proportional to increases in bouton number. (A) *spinster* has significantly increased branching ( $***P < 0.001$ , ANOVA)  $10.8 \pm 1.37$  ( $n = 11$ ) compared with wild-type  $5.3 \pm 0.44$  ( $n = 16$ ). *sod1* and *sod2* are not significantly different in this statistical test, with branch number of  $7.2 \pm 0.64$  ( $n = 16$ ) and  $3.5 \pm 0.32$  ( $n = 17$ ). (B) When normalized to bouton number, *sod1* and *spinster* branch numbers are not statistically different from wild-type;  $5.66 \pm 0.5$  ( $n = 16$ ) and  $6.1 \pm 0.74$  ( $n = 17$ ), respectively, ( $P > 0.05$ , ANOVA). *sod2* has a significantly decreased branch number  $2.8 \pm 0.26$  ( $n = 17$ ) ( $*P < 0.05$ , ANOVA). (C) The same pattern is seen when bouton number is normalized to allow for muscle surface area, thus accounting for muscle surface area. *sod1* and *spinster* do not have statistically different branch number  $3.92 \pm 1.75$  ( $n = 16$ ) and  $5.54 \pm 2$  ( $n = 16$ ) ( $P > 0.05$ , ANOVA); *sod2* has significantly reduced branching,  $2.01 \pm 1.4$  ( $n = 17$ ) ( $***P < 0.001$ , ANOVA).







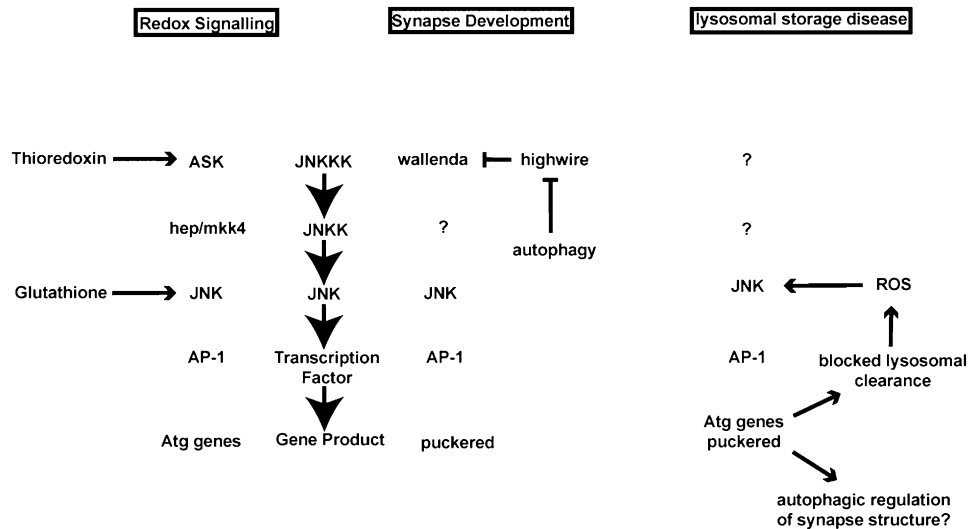

**Fig. S7.** OS induces synapse development by activation of the JNK/AP-1 pathway. The JNK signaling pathway is well known to regulate many aspects of synapse development and function (1–4), although the transcriptional targets of AP-1 that regulate synapse growth have yet to be identified. Up-regulation of the pathway promotes synapse growth, as shown in *hiw* mutants, where wallenda signaling is unrestrained, leading to overgrown NMJs via activation of *fos* (3). Furthermore, *hiw* levels are controlled by autophagy, thus in wild-type animals increasing autophagy leads to decreased levels of *hiw*, resulting in NMJ overgrowth (5). The synaptic overgrowth in *hiw* mutants is seen to be independent of autophagy, although the genes up-regulated by *fos* remain to be identified. Similar signaling pathways are also activated in response to OS (6–8) and in the context of lysosomal storage disease (LSD; *spin* is a model of LSD). Antioxidant and autophagic responses are known to be transcriptionally activated by OS via JNK/AP-1 (8, 9). In LSD, lysosomal accumulation generates OS, inducing autophagy, potentially via JNK/AP-1 activation. Increasing autophagy creates an additional burden on lysosomes, generating additional OS. OS and autophagy may regulate synapse growth and structure by damage and phagocytosis of adhesion molecules, contributing to synaptic growth dysregulation (10, 11).

1. Sanyal S, Sandstrom DJ, Hoeffler CA, Ramaswami M (2002) AP-1 functions upstream of CREB to control synaptic plasticity in *Drosophila*. *Nature* 416:870–874.
2. Sanyal S, Narayanan R, Consoulas C, Ramaswami M (2003) Evidence for cell autonomous AP1 function in regulation of *Drosophila* motor-neuron plasticity. *BMC Neurosci* 4:20.
3. Collins CA, Wairkar YP, Johnson SL, DiAntonio A (2006) Highwire restrains synaptic growth by attenuating a MAP kinase signal. *Neuron* 51:57–69.
4. Massaro CM, Pielage J, Davis GW (2009) Molecular mechanisms that enhance synapse stability despite persistent disruption of the spectrin/ankyrin/microtubule cytoskeleton. *J Cell Biol* 187:101–117.
5. Shen W, Ganetzky B (2009) Autophagy promotes synapse development in *Drosophila*. *J Cell Biol* 187:71–79.
6. Wang MC, Bohmann D, Jasper H (2003) JNK signaling confers tolerance to oxidative stress and extends lifespan in *Drosophila*. *Dev Cell* 5:811–816.
7. Saitoh M, et al. (1998) Mammalian thioredoxin is a direct inhibitor of apoptosis signal-regulating kinase (ASK) 1. *EMBO J* 17:2596–2606.
8. Wu H, Wang MC, Bohmann D (2009) JNK protects *Drosophila* from oxidative stress by transcriptionally activating autophagy. *Mech Dev* 126:624–637.
9. Jegga AG, Schneider L, Ouyang X, Zhang J (2011) Systems biology of the autophagy-lysosomal pathway. *Autophagy* 7:477–489.
10. Rowland AM, Richmond JE, Olsen JG, Hall DH, Bamber BA (2006) Presynaptic terminals independently regulate synaptic clustering and autophagy of GABAA receptors in *Caenorhabditis elegans*. *J Neurosci* 26:1711–1720.
11. Bamber BA, Rowland AM (2006) Shaping cellular form and function by autophagy. *Autophagy* 2:247–249.

**Table S1. Genotypes and data for normalization of bouton numbers and muscle surface area**

| Genotype and conditions                                                                                                             | Raw bouton no. $\pm$ SEM | MSA $\pm$ SEM      | Normalized bouton number | <i>n</i> |
|-------------------------------------------------------------------------------------------------------------------------------------|--------------------------|--------------------|--------------------------|----------|
| Wild-type                                                                                                                           | 85 $\pm$ 3.32            | 80,801 $\pm$ 2,265 | 85 $\pm$ 3.32            | 16       |
| <i>spin</i> GAL4 > UAS <i>Strx</i> <sup>CYTO</sup>                                                                                  | 78 $\pm$ 2.9             |                    |                          | 10       |
| <i>spin</i> GAL4 > UAS <i>hSOD1</i>                                                                                                 | 90 $\pm$ 4.12            |                    |                          | 24       |
| <i>spin</i> GAL4 > UAS <i>Scat</i>                                                                                                  | 76 $\pm$ 4.6             |                    |                          | 18       |
| <i>spin</i> <sup>4</sup> / <i>spin</i> <sup>5</sup>                                                                                 | 152 $\pm$ 4.33           | 76,580 $\pm$ 2,716 | 165 $\pm$ 10.3           | 32       |
| <i>spin</i> <sup>4</sup> / <i>spin</i> <sup>5</sup> with <i>spin</i> GAL4 > UAS <i>Strx</i> <sup>CYTO</sup>                         | 113 $\pm$ 8.3            |                    |                          | 10       |
| <i>spin</i> <sup>4</sup> / <i>spin</i> <sup>5</sup> with <i>spin</i> GAL4 > UAS <i>hSOD1</i>                                        | 110 $\pm$ 3.7            |                    |                          | 46       |
| <i>spin</i> <sup>4</sup> / <i>spin</i> <sup>5</sup> with <i>spin</i> GAL4 > UAS <i>Scat</i>                                         | 103 $\pm$ 5.9            |                    |                          | 17       |
| <i>sod1</i> <sup>n1</sup> / <i>sod1</i> <sup>n64</sup>                                                                              | 107 $\pm$ 4.8            | 60,421 $\pm$ 4,218 | 147 $\pm$ 6.31           | 21       |
| <i>sod2</i> <sup>Δ</sup> / <i>sod2</i> <sup>Δ02</sup>                                                                               | 107 $\pm$ 4.9            | 62,477 $\pm$ 3,136 | 146 $\pm$ 10.3           | 22       |
| <i>sod1</i> <sup>n1/+</sup>                                                                                                         | 100 $\pm$ 3.2            | 78,550 $\pm$ 3,655 | 103 $\pm$ 4.42           | 18       |
| <i>sod1</i> <sup>n64/+</sup>                                                                                                        | 87 $\pm$ 5.72            | 76,112 $\pm$ 2,544 | 92 $\pm$ 4.31            | 25       |
| <i>spin</i> <sup>5/+</sup>                                                                                                          | 85 $\pm$ 3.66            | 75,229 $\pm$ 2,665 | 91 $\pm$ 6.49            | 12       |
| <i>spin</i> <sup>4/+</sup>                                                                                                          | 93 $\pm$ 4.00            | 80,008 $\pm$ 2,321 | 94 $\pm$ 4.10            | 31       |
| <i>spin</i> <sup>5/+</sup> ; <i>sod1</i> <sup>n1/+</sup>                                                                            | 121 $\pm$ 3.89           | 75,440 $\pm$ 2,355 | 130 $\pm$ 6.29           | 24       |
| <i>spin</i> <sup>4/+</sup> ; <i>sod1</i> <sup>n1/+</sup>                                                                            | 114 $\pm$ 4.39           | 72,512 $\pm$ 4,565 | 127 $\pm$ 5.47           | 19       |
| <i>spin</i> <sup>5/+</sup> ; <i>sod1</i> <sup>n64/+</sup>                                                                           | 137 $\pm$ 3.87           | 78,594 $\pm$ 2,157 | 141 $\pm$ 6.14           | 28       |
| <i>spin</i> <sup>4/+</sup> ; <i>sod1</i> <sup>n64/+</sup>                                                                           | 116 $\pm$ 7.3            | 71,662 $\pm$ 6,982 | 131 $\pm$ 8.03           | 21       |
| <i>spin</i> GAL4 > UAS <i>Jun</i> <sup>DN</sup>                                                                                     | 64 $\pm$ 3.24            | 73,243 $\pm$ 3,578 | 76 $\pm$ 7.02            | 18       |
| <i>spin</i> GAL4 > UAS <i>fos</i> <sup>DN</sup>                                                                                     | 56 $\pm$ 2.29            | 75,297 $\pm$ 3,820 | 65 $\pm$ 6.25            | 18       |
| <i>spin</i> GAL4 > UAS <i>jnk</i> <sup>DN</sup>                                                                                     | 75 $\pm$ 3.31            | 76,823 $\pm$ 2,152 | 79 $\pm$ 3.83            | 23       |
| <i>spin</i> GAL4 > UAS <i>Sask</i> <sup>DN</sup>                                                                                    | 60 $\pm$ 4.18            | 79,476 $\pm$ 4,102 | 61 $\pm$ 4.66            | 15       |
| <i>spin</i> <sup>4</sup> / <i>spin</i> <sup>5</sup> with <i>spin</i> GAL4 > UAS <i>Jun</i> <sup>DN</sup>                            | 148 $\pm$ 7.19           |                    |                          | 22       |
| <i>spin</i> <sup>4</sup> / <i>spin</i> <sup>5</sup> with <i>spin</i> GAL4 > UAS <i>fos</i> <sup>DN</sup>                            | 74 $\pm$ 1.92            |                    |                          | 19       |
| <i>spin</i> <sup>4</sup> / <i>spin</i> <sup>5</sup> with <i>spin</i> GAL4 > UAS <i>jnk</i> <sup>DN</sup>                            | 117 $\pm$ 5.79           |                    |                          | 16       |
| <i>spin</i> <sup>4</sup> / <i>spin</i> <sup>5</sup> with <i>spin</i> GAL4 > UAS <i>Sask</i> <sup>DN</sup>                           | 128 $\pm$ 6.37           |                    |                          | 16       |
| <i>sod1</i> <sup>n1</sup> / <i>sod1</i> <sup>n64</sup> with <i>spin</i> GAL4 > UAS <i>Jun</i> <sup>DN</sup>                         | 104 $\pm$ 3.69           | 69,466 $\pm$ 2,060 | 122 $\pm$ 3.88           | 18       |
| <i>sod1</i> <sup>n1</sup> / <i>sod1</i> <sup>n64</sup> with <i>spin</i> GAL4 > UAS <i>fos</i> <sup>DN</sup>                         | 59 $\pm$ 3.70            | 71,978 $\pm$ 2,063 | 67 $\pm$ 4.62            | 21       |
| <i>sod2</i> <sup>Δ</sup> / <i>sod2</i> <sup>Δ02</sup> <i>spin</i> <sup>5</sup> with <i>spin</i> GAL4 > UAS <i>Jun</i> <sup>DN</sup> | 72 $\pm$ 3.77            | 59,037 $\pm$ 3,609 | 102 $\pm$ 5.51           | 20       |
| <i>sod2</i> <sup>Δ</sup> / <i>sod2</i> <sup>Δ02</sup> <i>spin</i> <sup>5</sup> with <i>spin</i> GAL4 > UAS <i>fos</i> <sup>DN</sup> | 65 $\pm$ 4.25            | 76,877 $\pm$ 2,881 | 70 $\pm$ 5.98            | 23       |
| <i>sod2</i> <sup>Δ</sup> / <i>sod2</i> <sup>Δ02</sup> <i>spin</i> <sup>5</sup> with <i>spin</i> GAL4 > UAS <i>jnk</i> <sup>DN</sup> | 84 $\pm$ 4.28            | 73,878 $\pm$ 2,423 | 94 $\pm$ 6.30            | 19       |
| <i>atg1</i> <sup>PZ</sup> / <i>atg1</i> <sup>DG</sup>                                                                               | 60 $\pm$ 3.23            |                    |                          | 19       |
| <i>atg18</i> <sup>KG</sup> / <i>Df</i>                                                                                              | 54 $\pm$ 3.96            |                    |                          | 28       |
| <i>atg18</i> <sup>KG</sup> / <i>atg1</i> <sup>DG</sup>                                                                              | 68 $\pm$ 6.34            |                    |                          | 28       |
| <i>spin</i> <sup>4</sup> / <i>spin</i> <sup>5</sup> with <i>atg1</i> <sup>PZ</sup> / <i>atg1</i> <sup>DG</sup>                      | 72 $\pm$ 4.90            |                    |                          | 28       |
| <i>spin</i> <sup>4</sup> / <i>spin</i> <sup>5</sup> with <i>atg18</i> <sup>KG</sup> / <i>Df</i>                                     | 75 $\pm$ 6.74            |                    |                          | 16       |
| <i>spin</i> <sup>4</sup> / <i>spin</i> <sup>5</sup> with <i>atg18</i> <sup>KG</sup> / <i>atg1</i> <sup>DG</sup>                     | 76 $\pm$ 5.83            |                    |                          | 16       |
| MHCGAL4 > UAS <i>hSOD1</i>                                                                                                          | 83 $\pm$ 6.37            |                    |                          | 15       |
| <i>spin</i> <sup>4</sup> / <i>spin</i> <sup>5</sup> with MHCGAL4 > UAS <i>hSOD1</i>                                                 | 103 $\pm$ 3.166          |                    |                          | 14       |
| <i>elav</i> GAL4 > UAS <i>hSOD1</i>                                                                                                 | 79 $\pm$ 4.02            |                    |                          | 16       |
| <i>spin</i> <sup>4</sup> / <i>spin</i> <sup>5</sup> with <i>elav</i> GAL4 > UAS <i>hSOD1</i>                                        | 106 $\pm$ 7.99           |                    |                          | 14       |
| MHCGAL4 > UAS <i>fos</i> <sup>DN</sup>                                                                                              | 79 $\pm$ 3.68            |                    |                          | 22       |
| <i>spin</i> <sup>4</sup> / <i>spin</i> <sup>5</sup> with MHCGAL4 > UAS <i>fos</i> <sup>DN</sup>                                     | 120 $\pm$ 8.42           |                    |                          | 11       |
| <i>elav</i> GAL4 > UAS <i>fos</i> <sup>DN</sup>                                                                                     | 68 $\pm$ 3.31            |                    |                          | 20       |
| <i>spin</i> <sup>4</sup> / <i>spin</i> <sup>5</sup> with <i>elav</i> GAL4 > UAS <i>fos</i> <sup>DN</sup>                            | 113 $\pm$ 9.49           |                    |                          | 9        |
| MHCGAL4 > UAS <i>Satg5RNAi</i>                                                                                                      | 98 $\pm$ 5.69            |                    |                          | 16       |
| <i>spin</i> <sup>4</sup> / <i>spin</i> <sup>5</sup> with MHCGAL4 > UAS <i>Satg5RNAi</i>                                             | 126 $\pm$ 6.51           |                    |                          | 16       |
| <i>elav</i> GAL4 > UAS <i>Satg5RNAi</i>                                                                                             | 81 $\pm$ 4.68            |                    |                          | 17       |
| <i>spin</i> <sup>4</sup> / <i>spin</i> <sup>5</sup> with <i>elav</i> GAL4 > UAS <i>Satg5RNAi</i>                                    | 127 $\pm$ 5.57           |                    |                          | 16       |
| Wild-type (male)                                                                                                                    | 74 $\pm$ 3.21            |                    |                          | 12       |
| <i>spin</i> GAL4 > UAS <i>hSOD1</i> (male)                                                                                          | 71 $\pm$ 2.89            |                    |                          | 21       |
| <i>hiw</i> (male)                                                                                                                   | 146 $\pm$ 5.72           |                    |                          | 20       |
| <i>hiw</i> with <i>spin</i> GAL4 > UAS <i>hSOD1</i> (male)                                                                          | 108 $\pm$ 5.93           |                    |                          | 25       |
| Wild-type (no paraquat)                                                                                                             | 78 $\pm$ 2.14            | 72,313 $\pm$ 2,837 | 78 $\pm$ 2.14            | 28       |
| <i>spin</i> GAL4 <sup>-</sup> > UAS <i>hSOD1</i> (no paraquat)                                                                      | 76 $\pm$ 5.56            | 75,308 $\pm$ 3,996 | 74 $\pm$ 4.13            | 21       |
| Wild-type (10 mM paraquat)                                                                                                          | 80 $\pm$ 6.64            | 52,003 $\pm$ 2,992 | 114 $\pm$ 8.26           | 21       |
| <i>spin</i> GAL4 <sup>-</sup> > UAS <i>hSOD1</i> (10 mM paraquat)                                                                   | 57 $\pm$ 2.64            | 59,332 $\pm$ 1,937 | 72 $\pm$ 4.07            | 41       |
| <i>spin</i> GAL4 > UAS <i>Jun</i> <sup>DN</sup> (no paraquat)                                                                       | 70 $\pm$ 3.50            | 67,204 $\pm$ 2,345 | 75 $\pm$ 4.00            | 22       |
| <i>spin</i> GAL4 > UAS <i>fos</i> <sup>DN</sup> (no paraquat)                                                                       | 55 $\pm$ 2.70            | 62,919 $\pm$ 4,115 | 56 $\pm$ 5.77            | 13       |
| <i>spin</i> GAL4 > UAS <i>jnk</i> <sup>DN</sup> (no paraquat)                                                                       | 80 $\pm$ 4.48            | 78,220 $\pm$ 3,408 | 75 $\pm$ 3.59            | 22       |
| <i>spin</i> GAL4 > UAS <i>Sask</i> <sup>DN</sup> (no paraquat)                                                                      | 54 $\pm$ 3.64            | 81,124 $\pm$ 2,338 | 63 $\pm$ 4.45            | 16       |
| <i>spin</i> GAL4 > UAS <i>Jun</i> <sup>DN</sup> (10 mM paraquat)                                                                    | 56 $\pm$ 1.93            | 64,242 $\pm$ 1,950 | 65 $\pm$ 2.64            | 55       |
| <i>spin</i> GAL4 > UAS <i>fos</i> <sup>DN</sup> (10 mM paraquat)                                                                    | 58 $\pm$ 2.23            | 57,525 $\pm$ 2,346 | 75 $\pm$ 5.26            | 19       |
